# Supplementary material
Source: publisher figshare collection journal article supplement (https://tandf.figshare.com/ndownloader/files/17247284)
Supplement: Supplementary file 1 [file 17247284]

## Supplementary Information

# Temperature and concentration effects on decyltrimethylammonium micelles in water

Karen J Edler and Daniel T. Bowron

Table S1: Lennard-Jones and Coulomb parameters used for the reference potentials

| Atom Label | Atom Type | $\epsilon$ / $\text{kJmol}^{-1}$ | $\sigma$ / $\text{\AA}$ | $q$ / $e$ | Mass / $\text{amu}$ |
|------------|-----------|----------------------------------|-------------------------|-----------|---------------------|
| Br         | Br        | 0.566                            | 4.465                   | -1.0000   | 80                  |
| MH         | H         | 0.200                            | 2.580                   | 0.0000    | 2                   |
| M          | H         | 0.200                            | 2.580                   | 0.0000    | 2                   |
| CH         | C         | 0.200                            | 3.700                   | 0.0000    | 12                  |
| C1-9       | C         | 0.200                            | 3.960                   | 0.0000    | 12                  |
| CT         | C         | 0.200                            | 3.960                   | 0.0000    | 12                  |
| N          | N         | 0.200                            | 3.200                   | +1.0000   | 14                  |
| OW         | O         | 0.650                            | 3.166                   | -0.8476   | 16                  |
| HW         | H         | 0.000                            | 0.000                   | +0.4238   | 2                   |

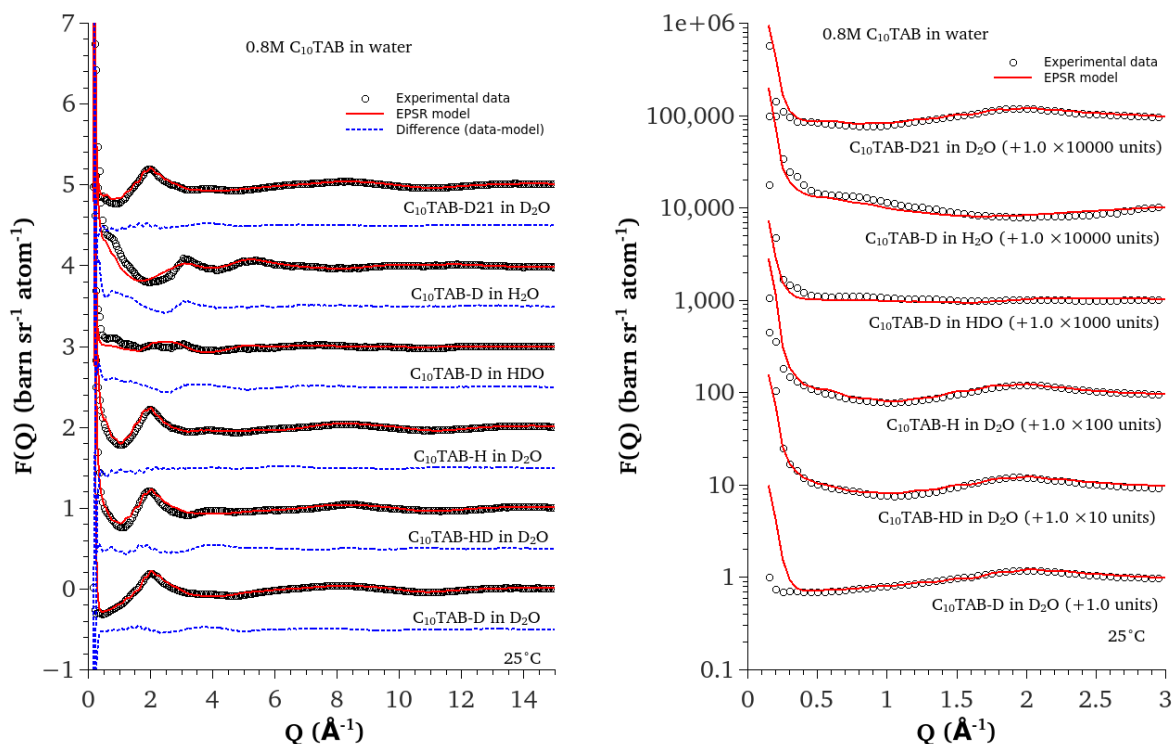

Figure S1: EPSR model fits for 0.8M  $\text{C}_{10}\text{TAB}$  at 25 °C (solid red lines) and fit residuals (dashed blue lines offset by 1.0 down the ordinate axis) to the diffraction data (black circles) of the five isotopic samples. The right hand graph expands the low  $Q$  region to highlight the fits to the data in this region. For clarity, each data set is offset up the ordinate, and each residual from its data set.

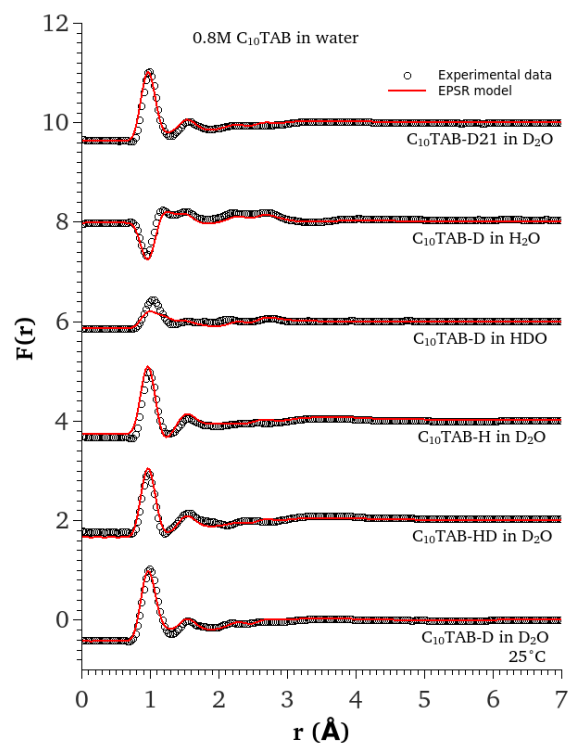

Figure S2: Comparison of the unnormalized pair distribution functions calculated from the EPSR model of the 0.8M C<sub>10</sub>TAB at 25 °C data.

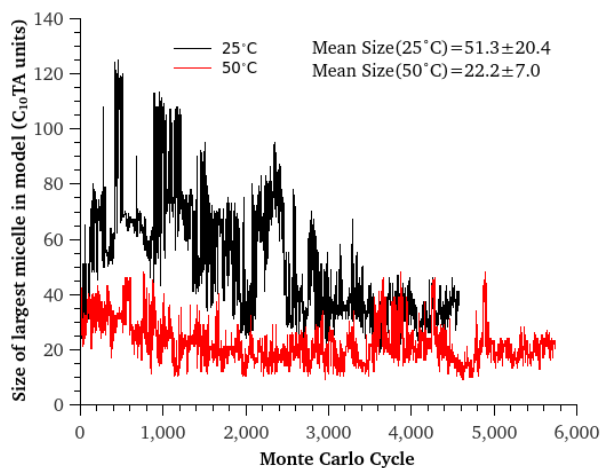

Figure S3: Tracking the number of C<sub>10</sub>TA monomers that make up the largest micelle in the EPSR refined model box as the ensemble averages are calculated, shows that larger micelles are formed in the 25 °C solution than in the 50 °C solution.

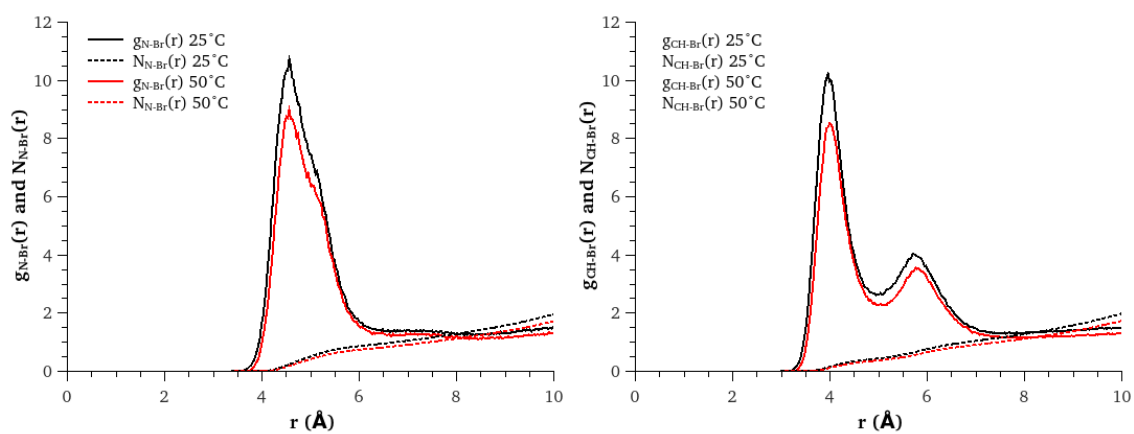

Figure S4: Partial distribution functions at 25 °C and 50 °C which show the relatively close association of the bromide anions with the cationic surfactant head group nitrogen sites (left) and methyl carbon sites (right).
